# Supplementary material for: 充分发挥财政职能 大力发展龙头企业——对甘肃省静宁成纪酒业有限责任公司发展现状的调查
Source: Royal Society of Chemistry journal article supplement (doi:10.1039/c9ra04311j), 2004-01-01
Supplement: c9ra04311j1.pdf [file c9ra04311j1.pdf]

## Supplementary information

### **The Synthesis of a $^{99m}\text{Tc}$ -Labeled Tetravalent Targeting Probe upon Isonitrile Coordination to $^{99m}\text{Tc}^{\text{I}}$ for Enhanced Target Uptake in Saturable Systems**

Yuki Mizuno<sup>†, ‡</sup>, Tomoya Uehara<sup>†</sup>, Chun-wei Jen<sup>†</sup>, Hiromichi Akizawa<sup>‡\*</sup>, and Yasushi Arano<sup>†</sup>

<sup>†</sup> Laboratory of Molecular Imaging and Radiotherapy, Graduate School of Pharmaceutical Sciences, Chiba University, 1-8-1 Inohana, Chuo-ku, Chiba 260-8675, Japan

<sup>‡</sup> Laboratory of Physical Chemistry, Showa Pharmaceutical University, 3-3165 Higashi-Tamagawagakuen, Machida, Tokyo 194-8543, Japan

- HPLC Methods
- Synthesis scheme of the compounds **8a**, **8b**, **16** (Scheme S1)
- Stability of  $\text{M} \cdot [\text{L}_\beta']_3$  ( $\text{M} = {}^{185/187}\text{Re}$  and  $^{99m}\text{Tc}$ ) at pH 6.0 (Figure S1)
- In vitro stability of  $^{99m}\text{Tc} \cdot [\text{L}_G]_4$  (Table S1, Figure S2)
- Competitive inhibition curves of the tested compounds (Figure S3)
- MS,  $^1\text{H-NMR}$ ,  $^{13}\text{C-NMR}$ , IR, and/or purity check of key compounds (Figure S4 ~ Figure S14)

**HPLC methods.** A L-7100 (Hitachi Ltd, Tokyo, Japan) equipped with a L-7405 UV detector (monitoring at 254 nm or 220 nm) and a NaI(Tl) radio-detector (Gabi star, Raytest Strubenhardt, Germany) were used for high performance liquid chromatography (HPLC).

Preparative RP-HPLC was performed with a Cadenza 5CD-C18 (20 × 150 mm, Imtakt Co., Kyoto, Japan) connected to a Cadenza 5CD-C18 guard cartridge (10 × 8 mm, Imtakt Co.) at a flow rate of 5 mL/min with a mobile phase starting from 45% solvent A (0.1% TFA/water) and 55% solvent B (0.1% TFA/MeOH) to 40% solvent A and 60% solvent B at 45 min (system 1) or starting from 50% solvent A (0.1% TFA/water) and 50% solvent B (0.1% TFA/MeOH) to 40% solvent A and 60% solvent B at 45 min (system 2) or starting from 50% solvent A (0.1% TFA/water) and 50% solvent B (0.1% TFA/MeOH) to 25% solvent A and 75% solvent B at 40 min (system 3) or starting from 90% solvent A (Water) and 10% solvent B (MeCN) to 82.5% solvent A and 17.5% solvent B at 30 min to 100% solvent B at 35 min (system 4) or with a Cadenza CW-C18 (10 × 150 mm, Imtakt Co.) at a flow rate of 3 mL/min with an isocratic mobile phase of 56.5% solvent A (0.1% TFA/water) and 43.5% solvent B (0.1% TFA/MeOH) (0-30 min), followed by linear gradient over 5 min to 100% solvent B (system 5).

Analytical RP-HPLC was performed with a Cadenza 5CD-C18 (4.6 × 150 mm, Imtakt Co.) at a flow rate of 1 mL/min with a mobile phase starting from 50% solvent A (0.1% TFA/water) and 50% solvent B (0.1% TFA/MeOH) to 40% solvent A and 60% solvent B at 25 min to 100% solvent B at 27 min (system 6) or starting from 50% solvent A (0.1% TFA/water) and 50% solvent B (0.1%

TFA/MeOH) to 25% solvent A and 75% solvent B at 25 min to 100% solvent B at 27 min (system 7) or with an isocratic mobile phase of 70% solvent A (0.1% TFA/water) and 30% solvent B (0.1% TFA/MeOH) (0-5 min), followed by linear gradient over 10 min to 100% solvent B (system 8) or with a Cadenza CW-C18 (4.6 × 150 mm, Imtakt Co.) at a flow rate of 0.7 mL/min with a mobile phase starting from 57% solvent A (0.1% TFA/water) and 43% solvent B (0.1% TFA/MeOH) to 52% solvent A and 48% solvent B at 20 min to 100% solvent B at 25 min, followed by an isocratic mobile phase of 100% solvent B for 2 min (system 9) or starting from 90% solvent A (Water) and 10% solvent B (MeCN) to 75% solvent A and 25% solvent B at 20 min (system 10) or starting from 59% solvent A (0.1% TFA/water) and 41% solvent B (0.1% TFA/MeOH) to 54% solvent A and 46% solvent B at 20 min to 100% solvent B at 25 min, followed by an isocratic mobile phase of 100% solvent B for 2 min (system 11).

**Scheme S1. Synthesis of L $\beta$ ' (8a), L $\gamma$ ' (8b), and L $\gamma$  (16)<sup>a</sup>**

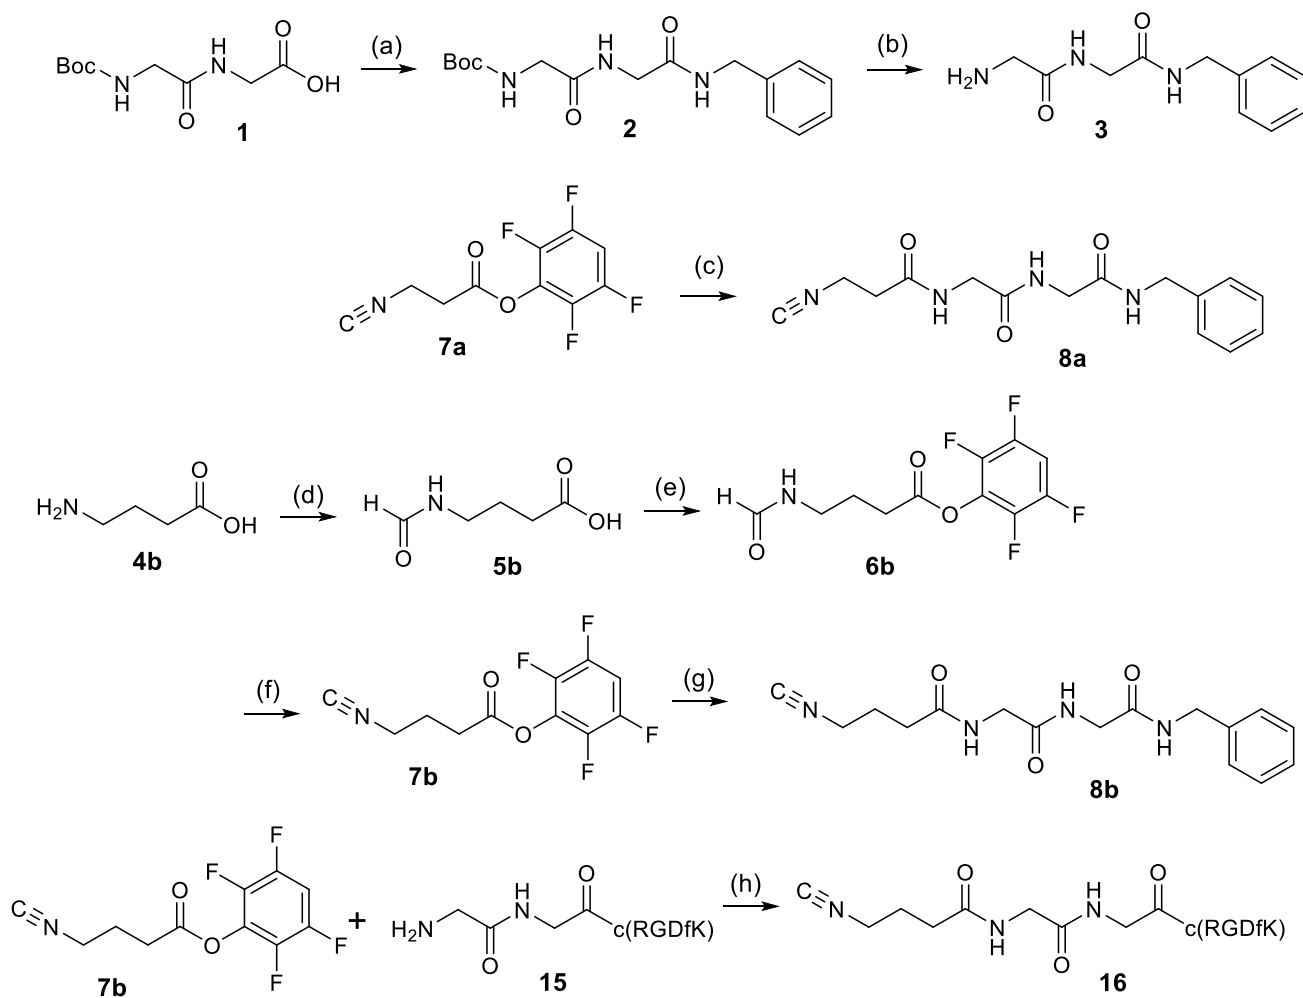

<sup>a</sup>Reagents and conditions: (a) benzyl amine, EDC·HCl, CHCl<sub>3</sub>, 76%; (b) TFA; (c) compound **3**, NaHCO<sub>3</sub>, DMF, 72%; (d) formic acid, acetic anhydride, 39%; (e) 2,3,5,6-tetrafluorophenol, EDC·HCl, CHCl<sub>3</sub>, 83%; (f) Burgess reagent, CH<sub>2</sub>Cl<sub>2</sub>, 60%; (g) compound **3**, NaHCO<sub>3</sub>, DMF, 63%; (h) NaHCO<sub>3</sub>, DMF, 52%.

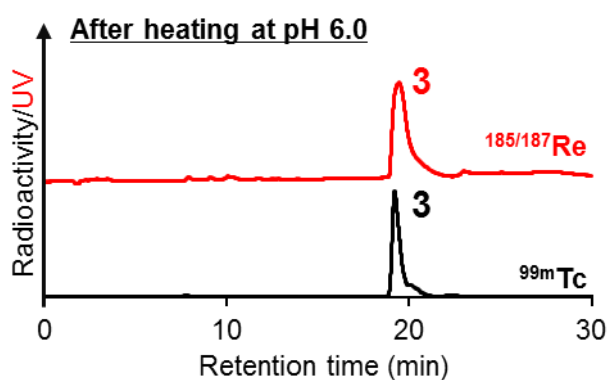

**Figure S1.** HPLC analyses (system 6) of  $\text{M}-[\text{L}\beta^3]_3$  ( $\text{M} = ^{185/187}\text{Re}$  and  $^{99\text{m}}\text{Tc}$ ) after heating at  $100^\circ\text{C}$  for 30 min at pH 6.0.  $\text{M}-[\text{L}\beta^3]_3$  remained intact after the heating.

**Table S1.** In vitro stability of  $^{99\text{m}}\text{Tc}-[\text{L}_G]_4$  in 10 mM histidine solution and murine plasma<sup>a</sup>

| time (h) | percent of intact |                |
|----------|-------------------|----------------|
|          | 10 mM Histidine   | Murine Plasma  |
| 1        | $98.5 \pm 0.2$    | $99.1 \pm 0.1$ |
| 6        | $98.1 \pm 0.2$    | $98.7 \pm 0.4$ |

<sup>a</sup>Results are expressed as mean  $\pm$  SD of three experiments. Percent of intact was determined by TLC analysis.

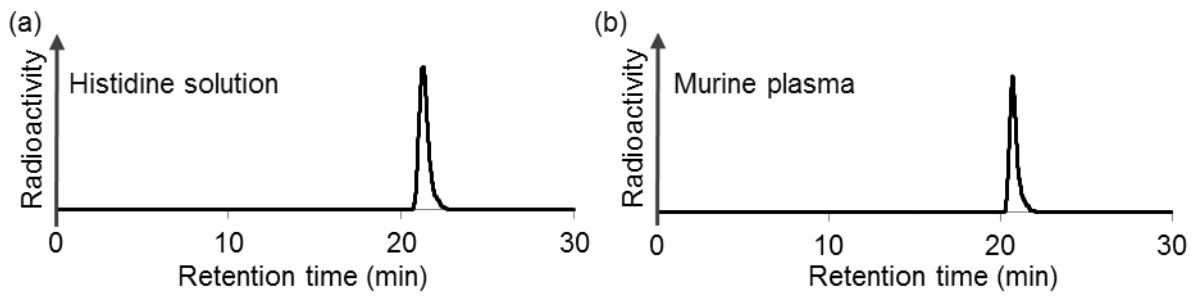

**Figure S2.** In vitro stability of  $^{99m}\text{Tc}$ -[LG]<sub>4</sub> in histidine solution and murine plasma. HPLC analysis after 6 h incubation (a) in 10 mM histidine solution and (b) in murine plasma. Plasma proteins were precipitated with EtOH prior to HPLC analysis.

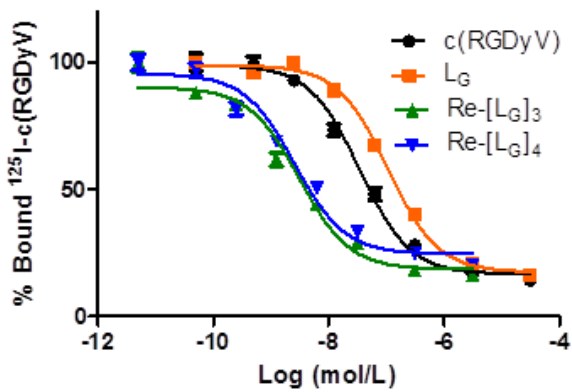

**Figure S3.** In vitro inhibition curves of  $^{125}\text{I}$ -c(RGDyV) bound to U87MG glioma cells by LG, Re-[LG]<sub>3</sub>, Re-[LG]<sub>4</sub>, and c(RGDyV) at 37 °C.

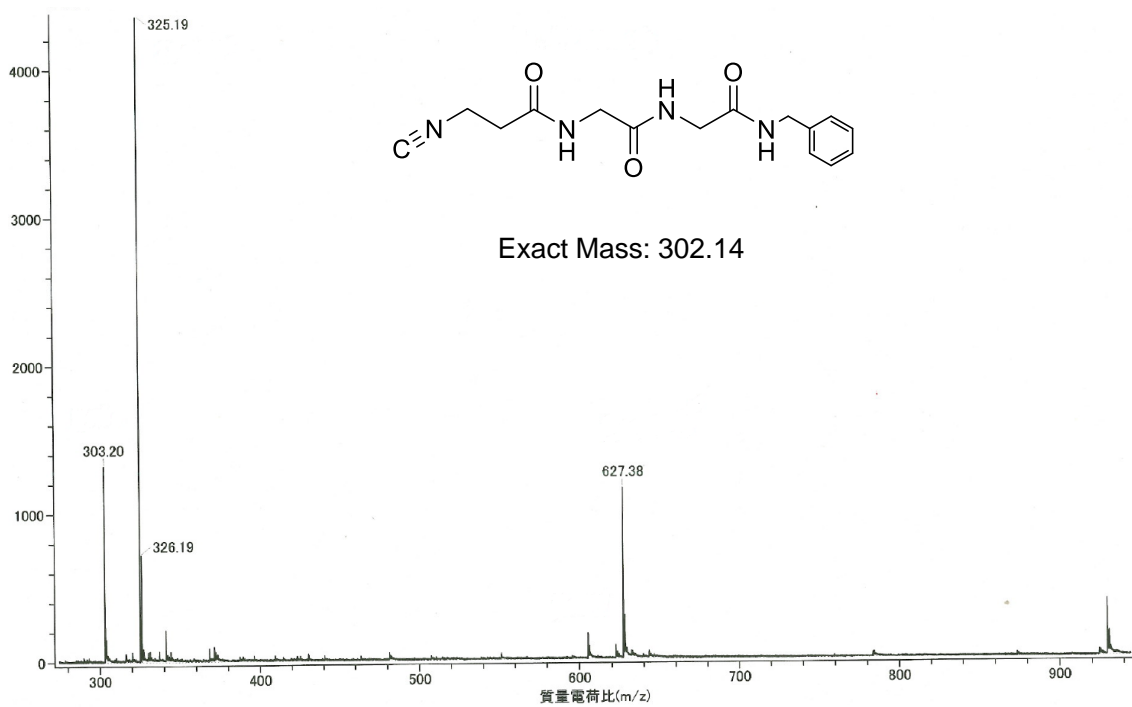

Figure S4a. ESI-MS spectrum of  $L_{\beta}'$  (**8a**).

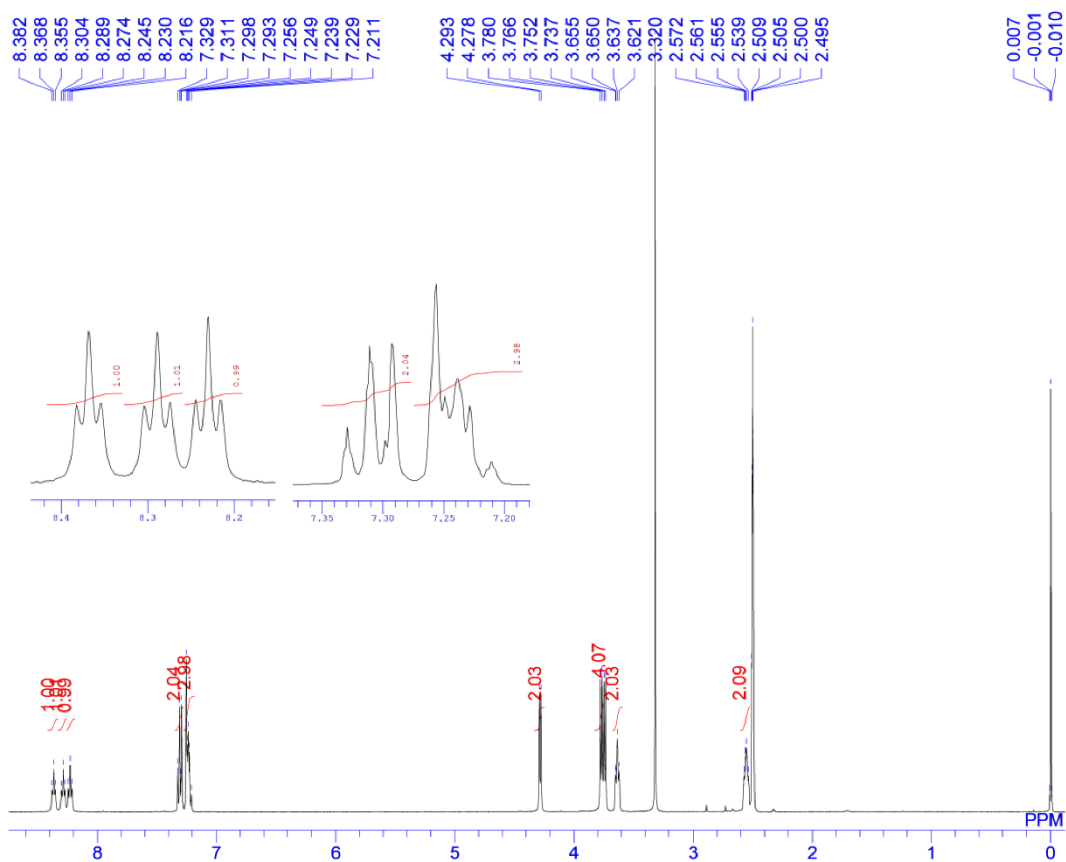

Figure S4b. <sup>1</sup>H NMR spectrum of  $L_{\beta}'$  (**8a**) in  $DMSO-d_6$ .

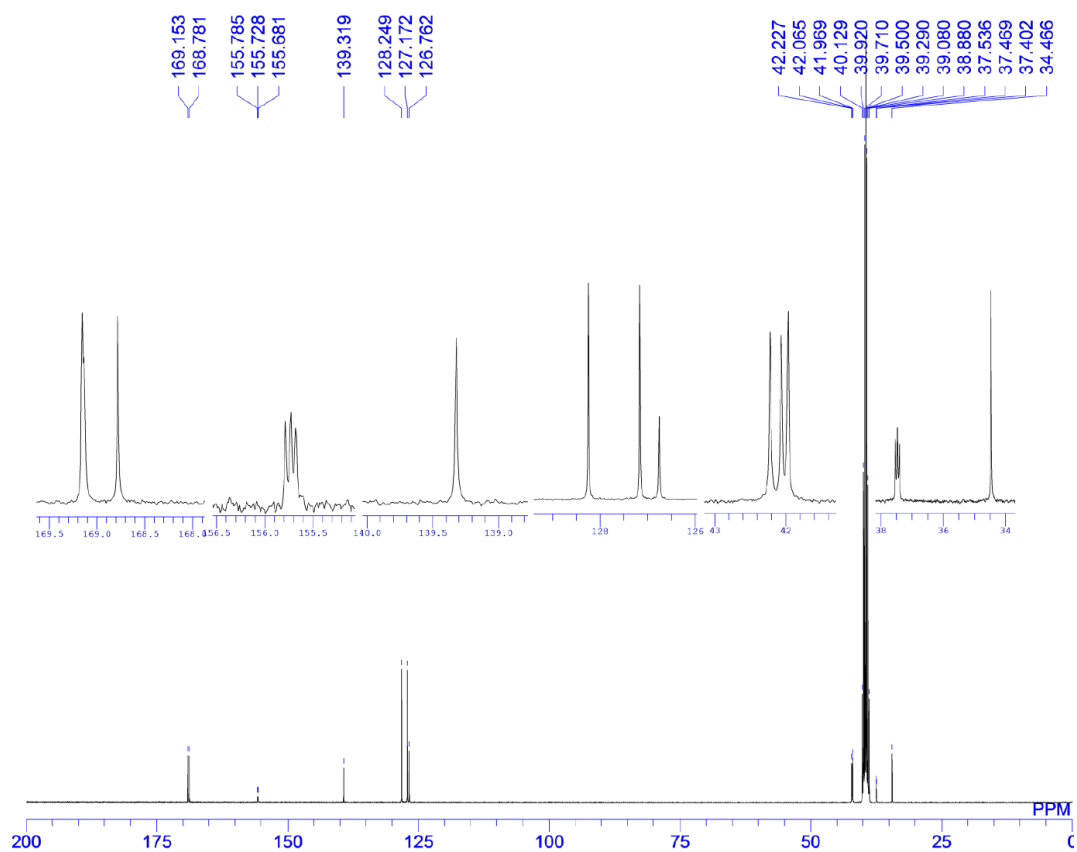

**Figure S4c.** <sup>13</sup>C NMR spectrum of L $\beta$ ' (**8a**) in DMSO-*d*<sub>6</sub>.

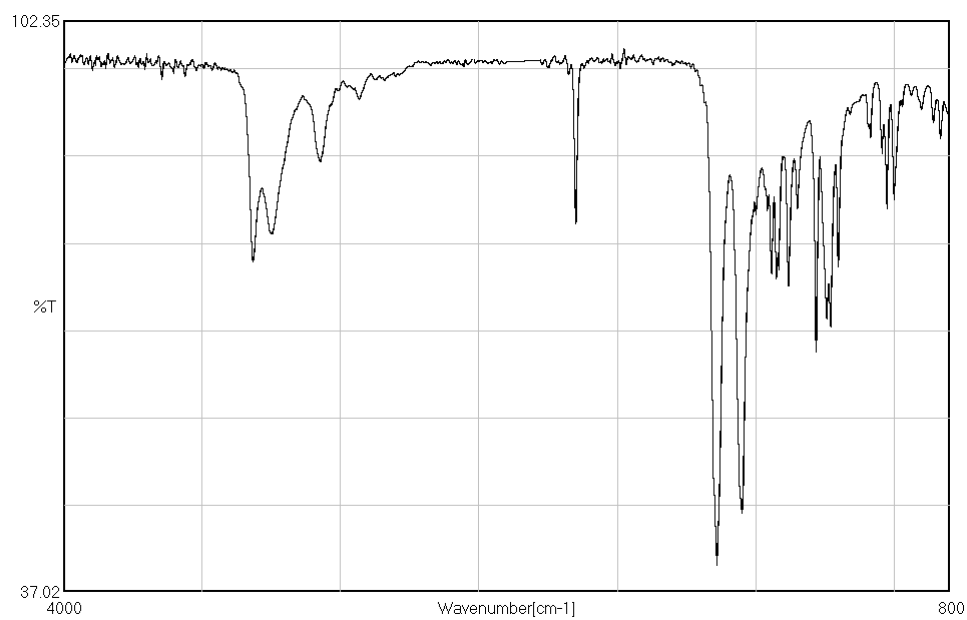

**Figure S4d.** IR spectrum (ATR) of L $\beta$ ' (**8a**).



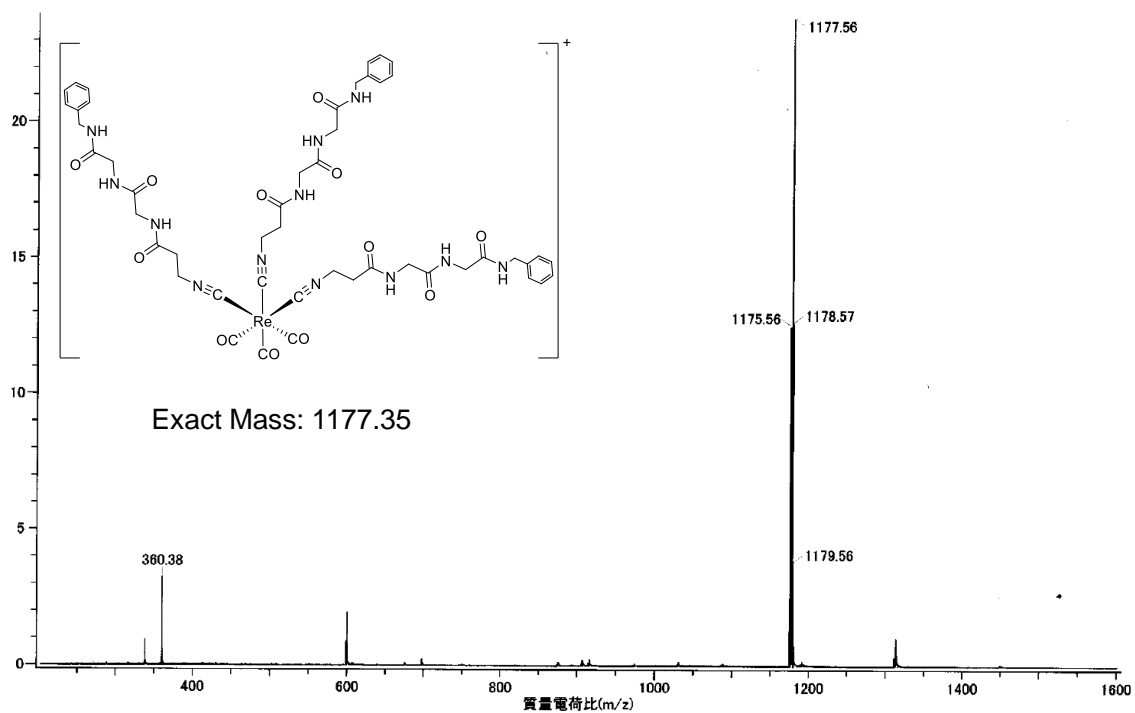

Figure S5a. ESI-MS spectrum of  $[^{185/187}\text{Re}(\text{CO})_3(\text{L}\beta')_3]^+$  (**9**).

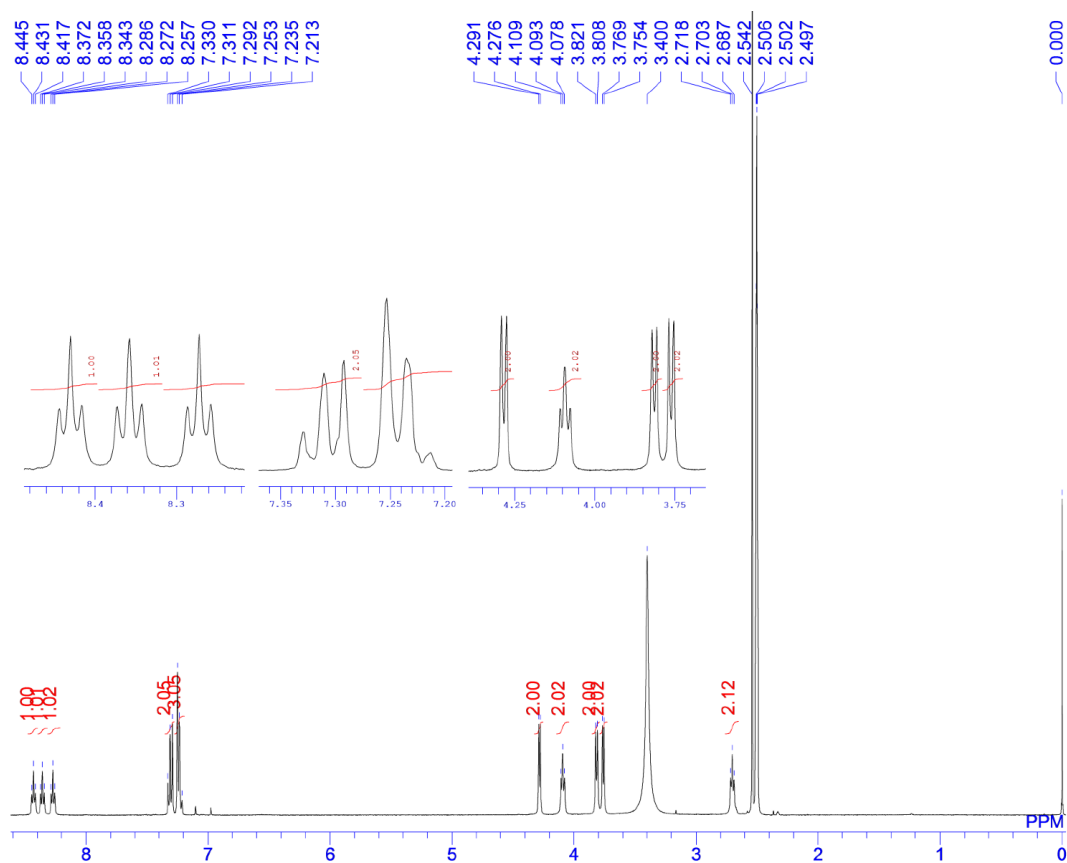

Figure S5b.  $^1\text{H}$  NMR spectrum of  $[^{185/187}\text{Re}(\text{CO})_3(\text{L}\beta')_3]^+$  (**9**) in  $\text{DMSO}-d_6$ .

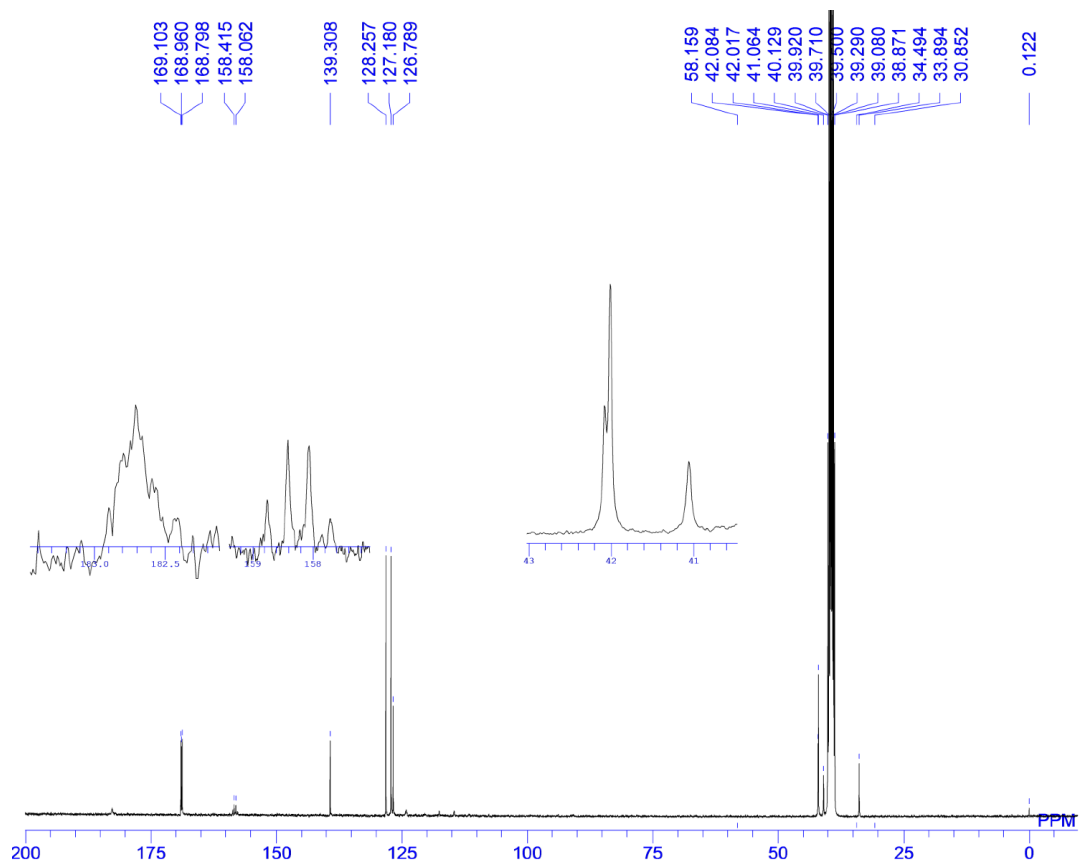

**Figure S5c.**  $^{13}\text{C}$  NMR of  $[\text{}^{185/187}\text{Re}(\text{CO})_3(\text{L}_{\beta'}')_3]^+$  (**9**) in  $\text{DMSO-}d_6$ .

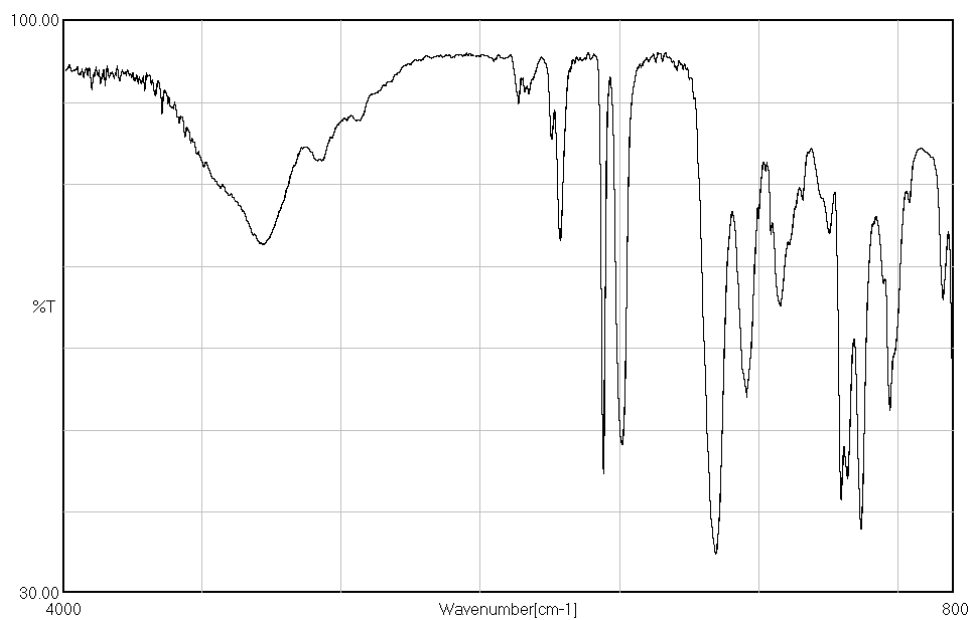

**Figure S5d.** IR spectrum (ATR) of  $[\text{}^{185/187}\text{Re}(\text{CO})_3(\text{L}_{\beta'}')_3]^+$  (**9**).

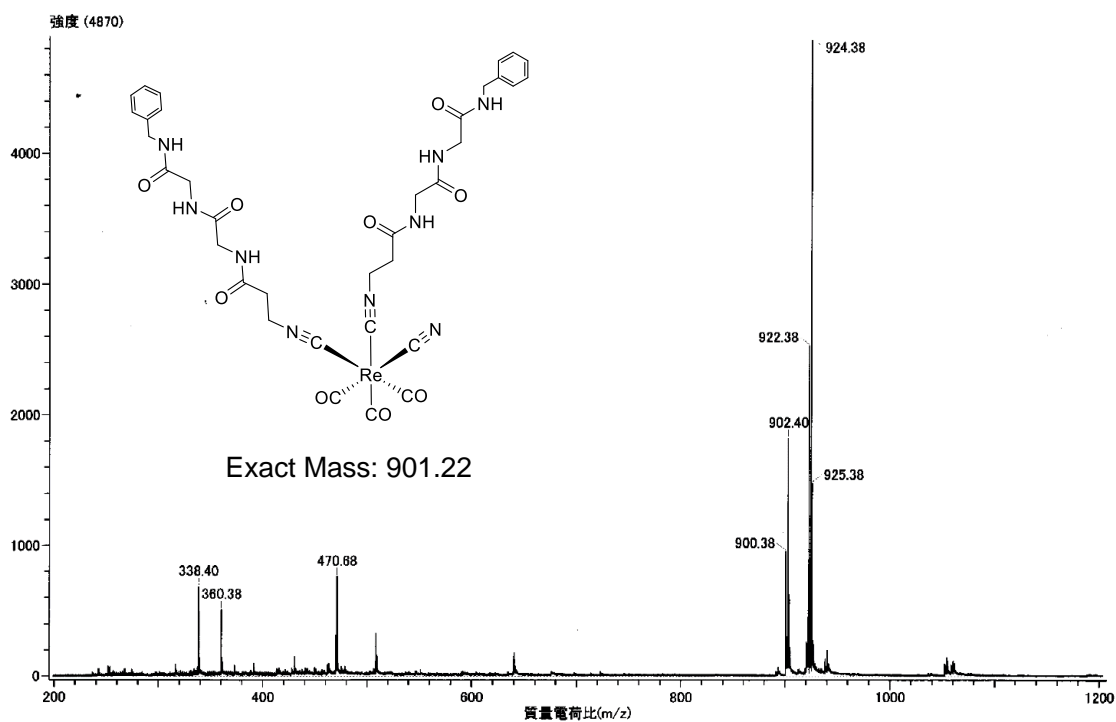

Figure S6a. ESI-MS spectrum of  $[^{185/187}\text{Re}(\text{CO})_3(\text{CN})(\text{L}_\beta')_2]$  (**13**).

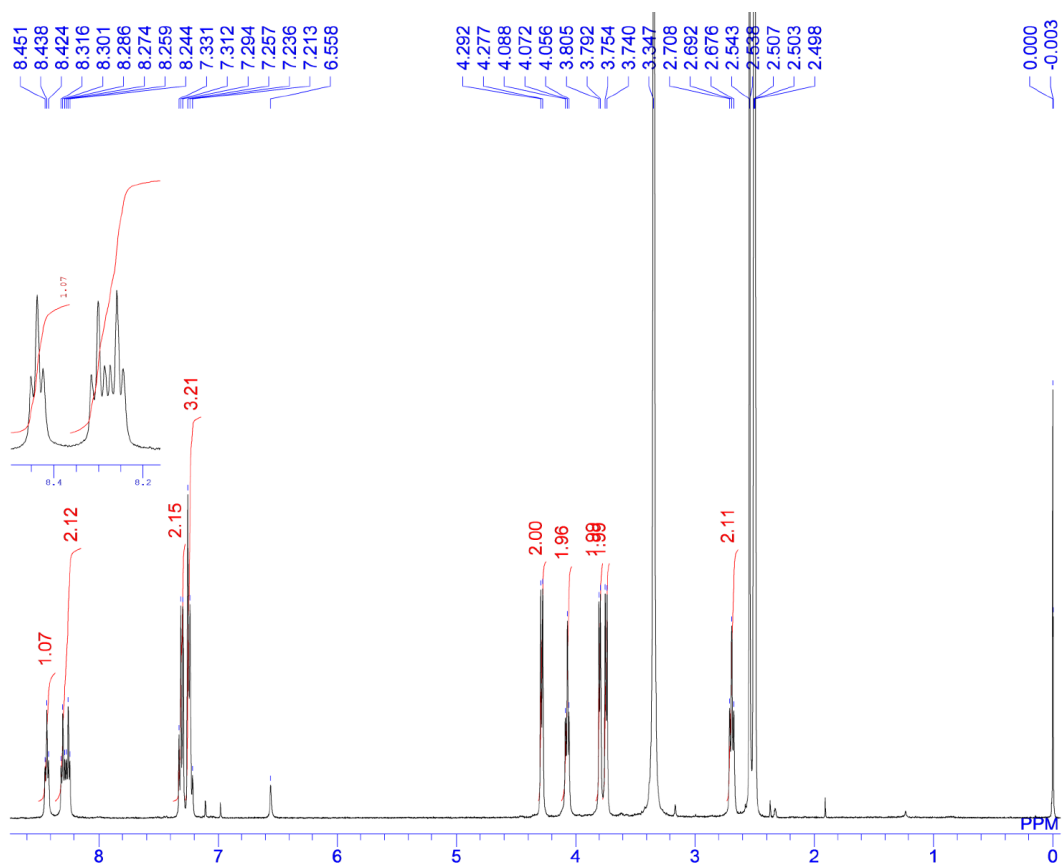

Figure S6b.  $^1\text{H}$  NMR spectrum of  $[^{185/187}\text{Re}(\text{CO})_3(\text{CN})(\text{L}_\beta')_2]$  (**13**) in  $\text{DMSO-}d_6$ .

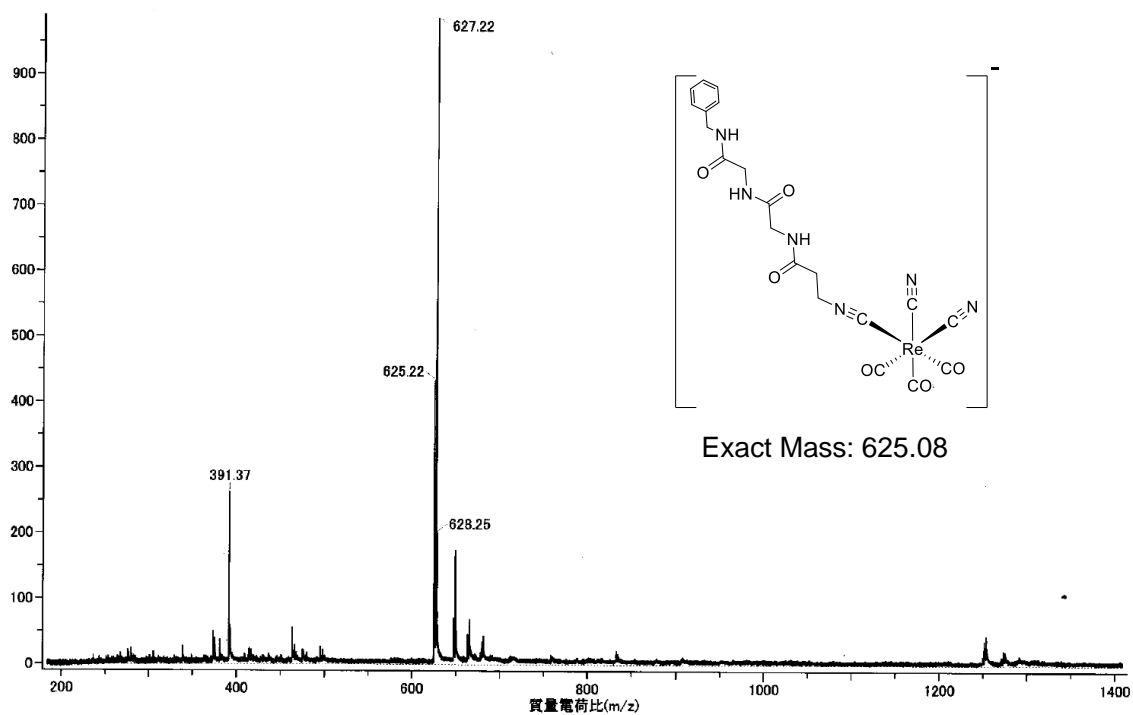

**Figure S7a.** ESI-MS spectrum of  $[\text{}^{185/187}\text{Re}(\text{CO})_3(\text{CN})_2(\text{L}_\beta^-)]^-$  (**14**).

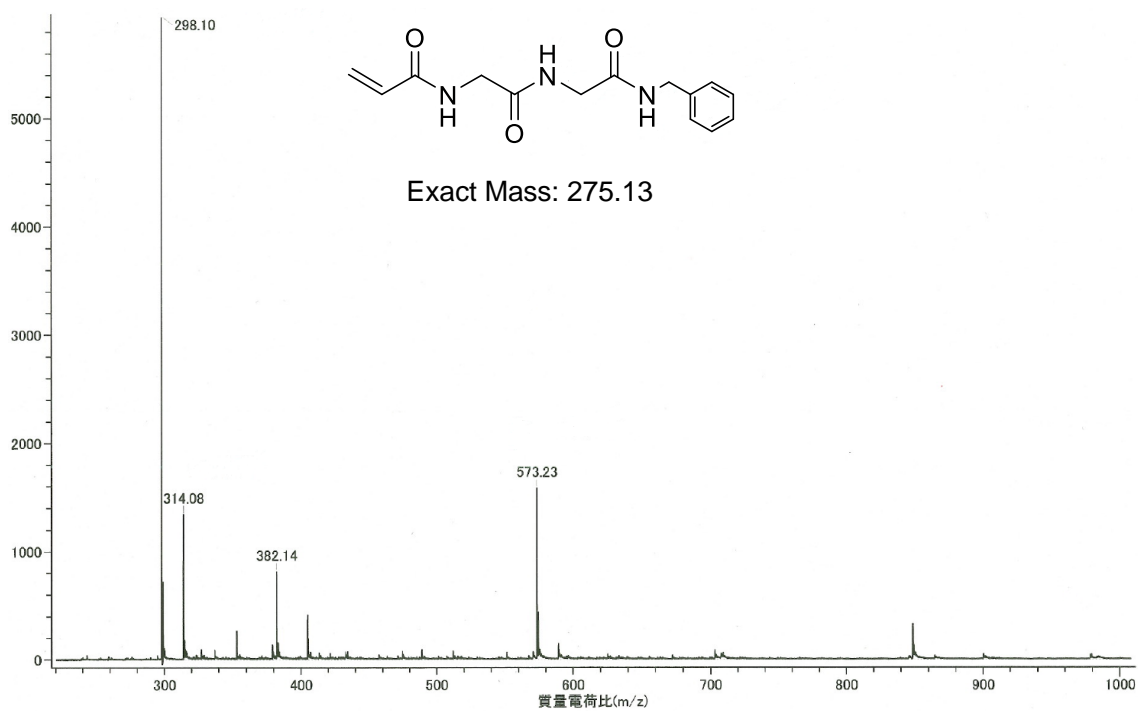

Figure S8a. ESI-MS spectrum of the eliminated ligand (12).

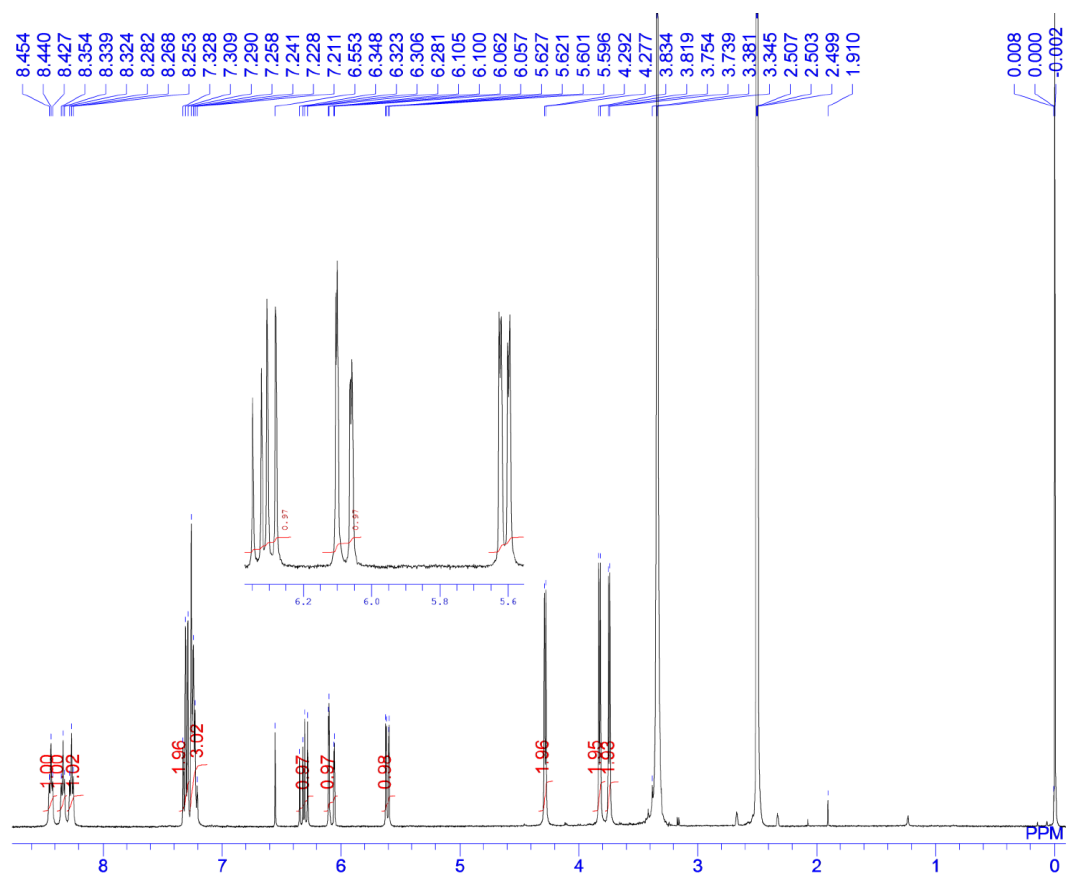

Figure S8b. <sup>1</sup>H NMR spectrum of the eliminated ligand (12) in DMSO-*d*<sub>6</sub>.

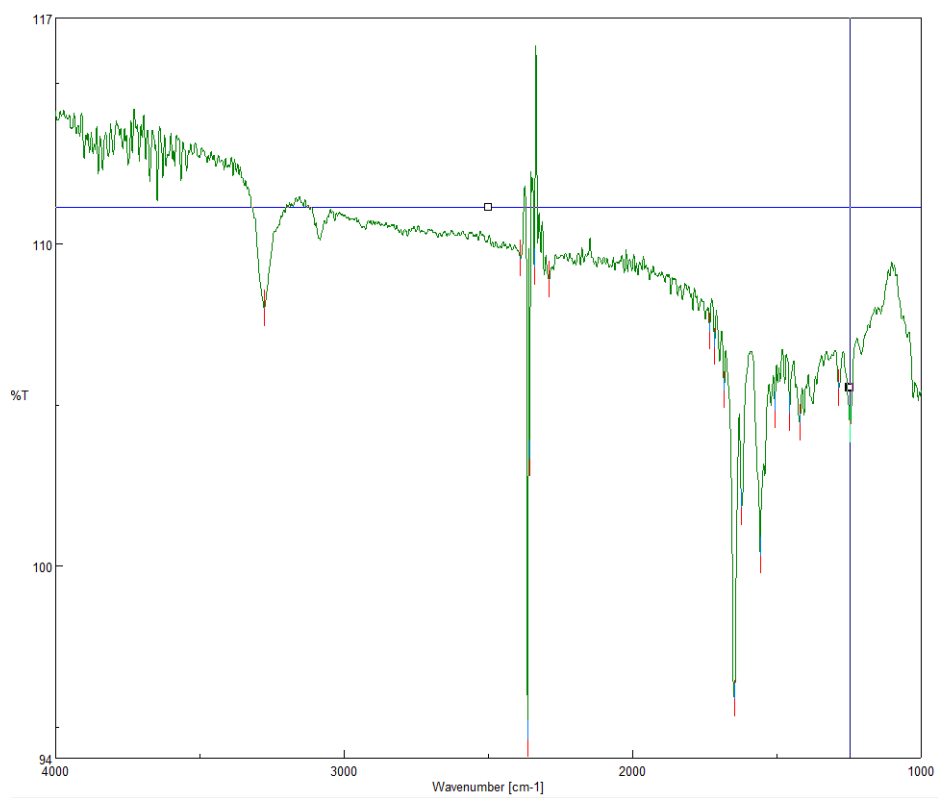

**Figure S8c.** IR spectrum (ATR) of the eliminated ligand (**12**).

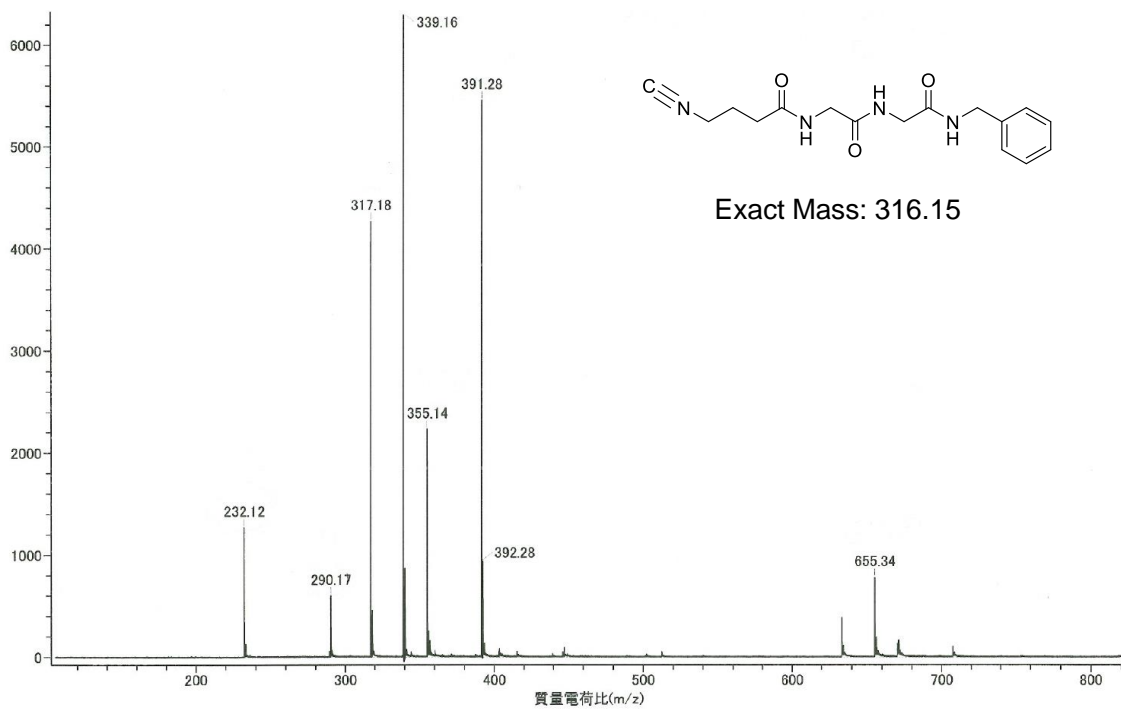

Figure S9a. ESI-MS spectrum of LG' (8b).

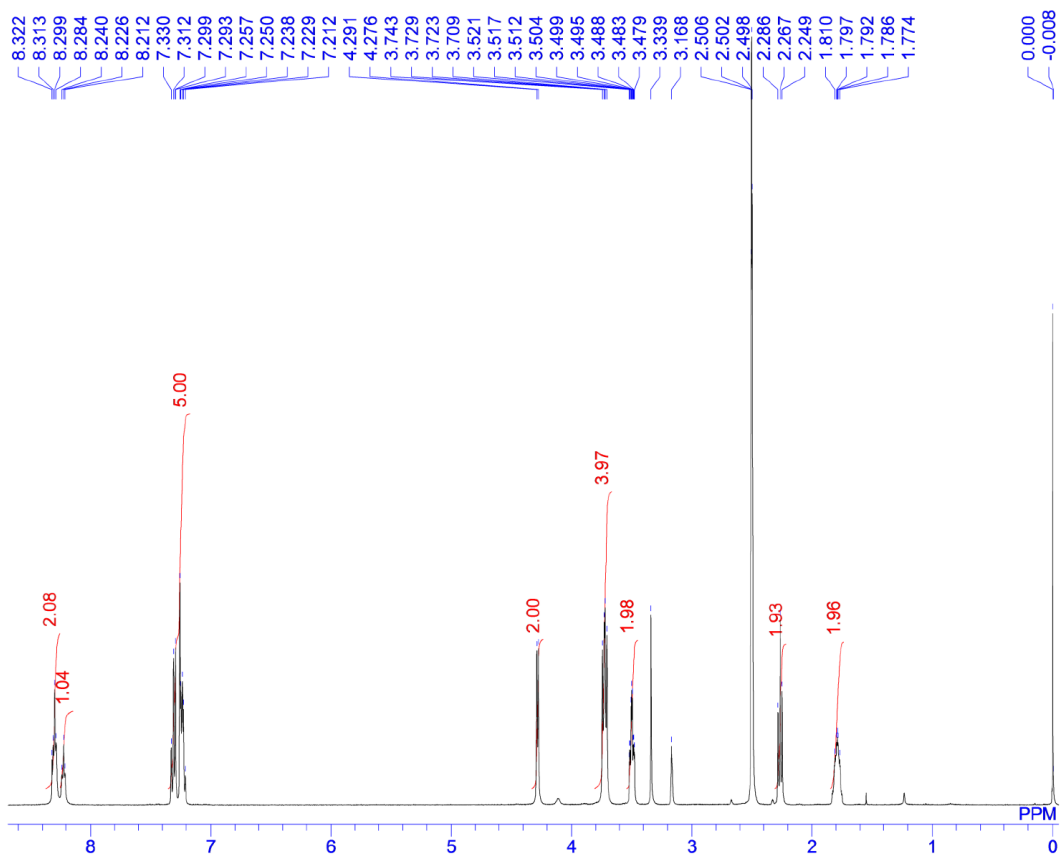

Figure S9b. <sup>1</sup>H NMR spectrum of LG' (8b) in DMSO-*d*<sub>6</sub>.

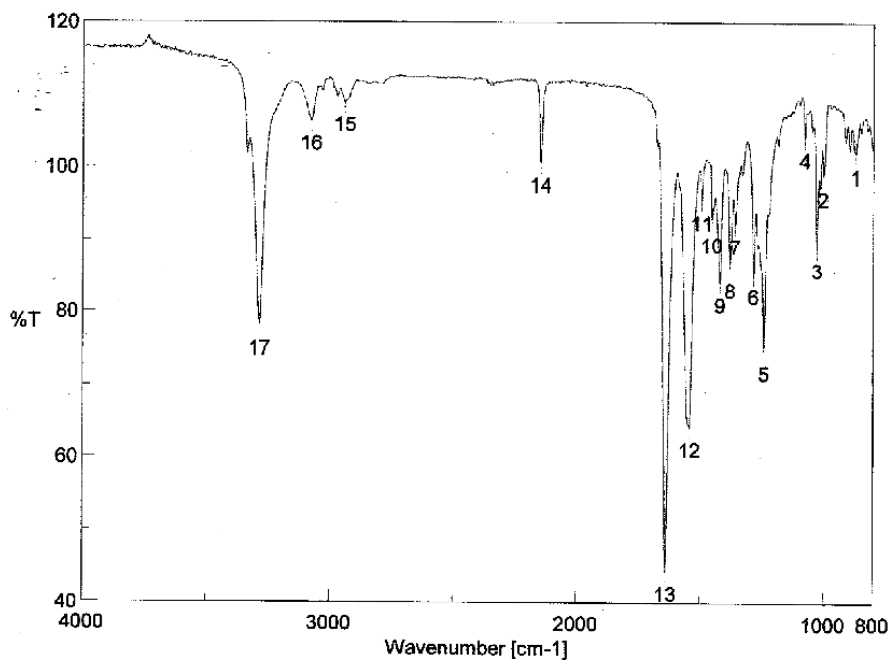

Figure S9c. IR spectrum (ATR) of LG' (8b).



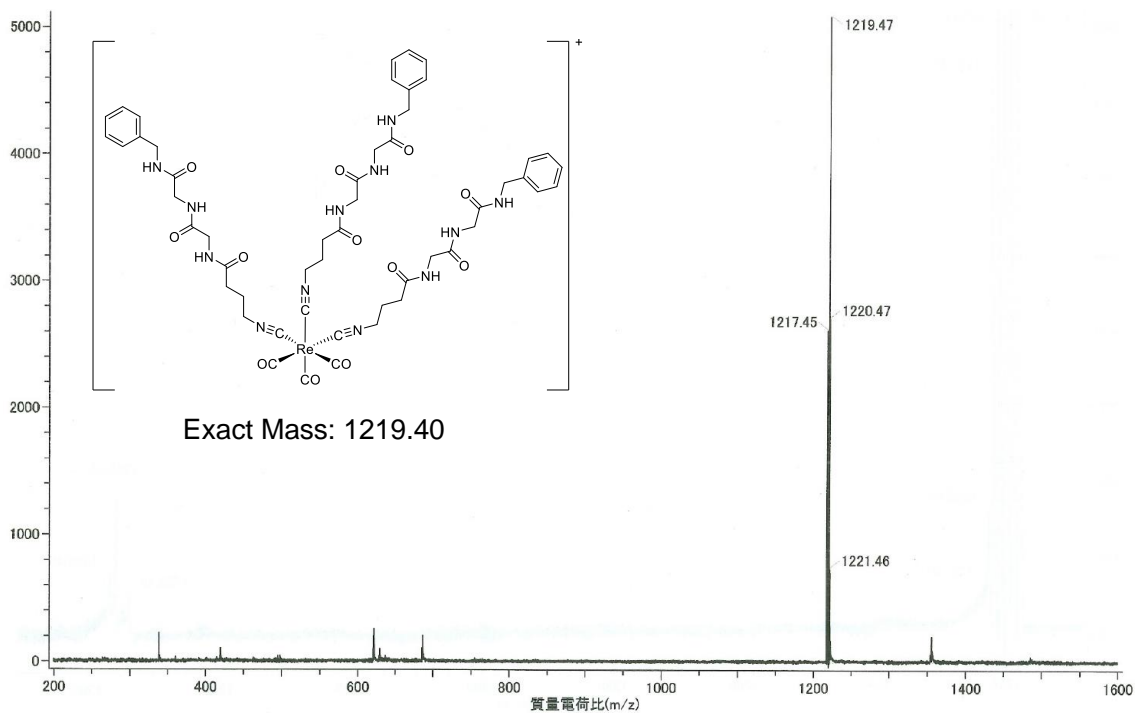

Figure S10a. ESI-MS spectrum of  $[^{185/187}\text{Re}(\text{CO})_3(\text{L}_G')_3]^+$  (**10**).

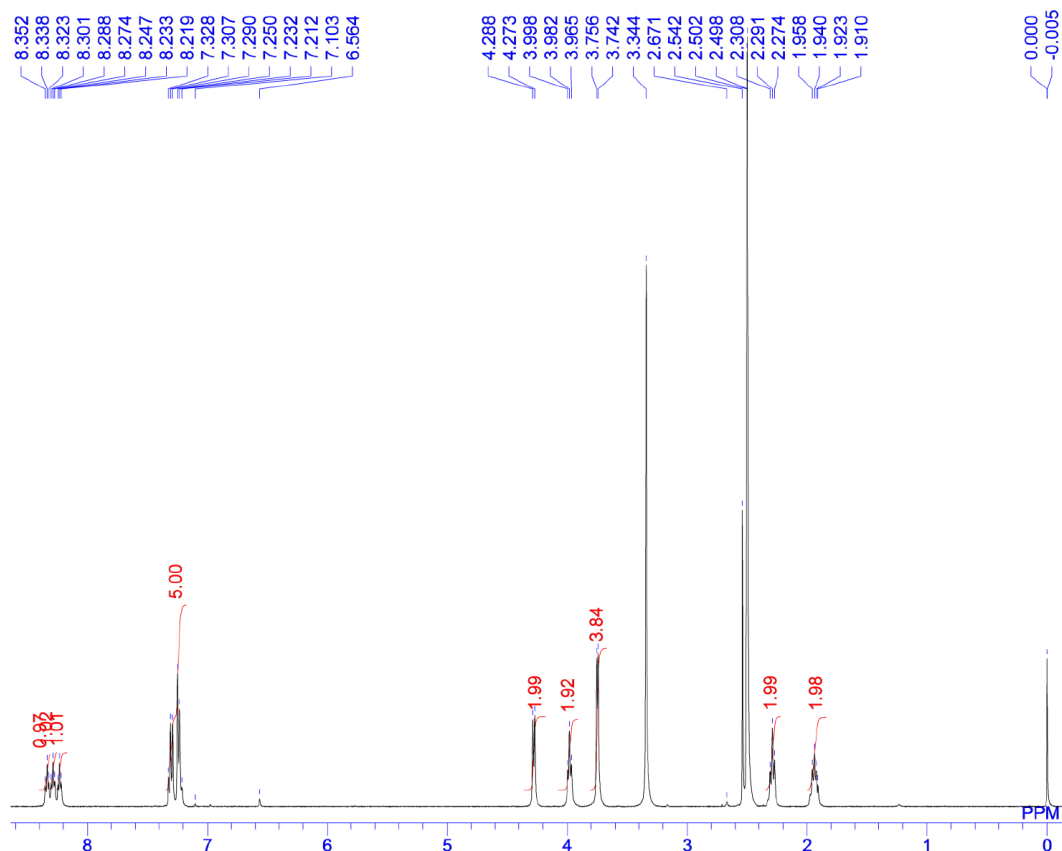

Figure S10b.  $^1\text{H}$  NMR spectrum of  $[^{185/187}\text{Re}(\text{CO})_3(\text{L}_G')_3]^+$  (**10**) in  $\text{DMSO-}d_6$ .

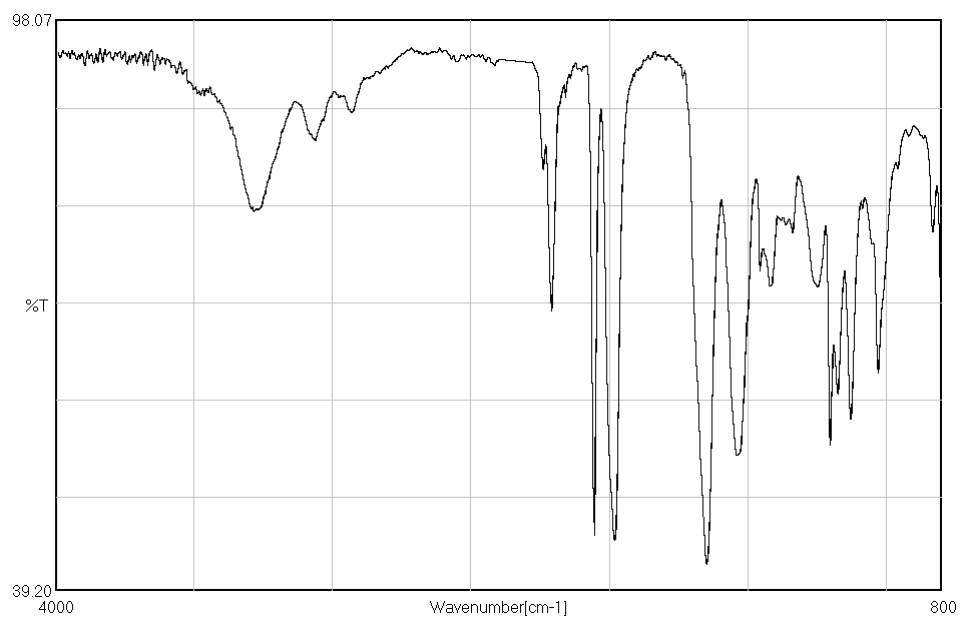

**Figure S10c.** IR spectrum (ATR) of  $[^{185/187}\text{Re}(\text{CO})_3(\text{LG}')_3]^+$  (**10**).

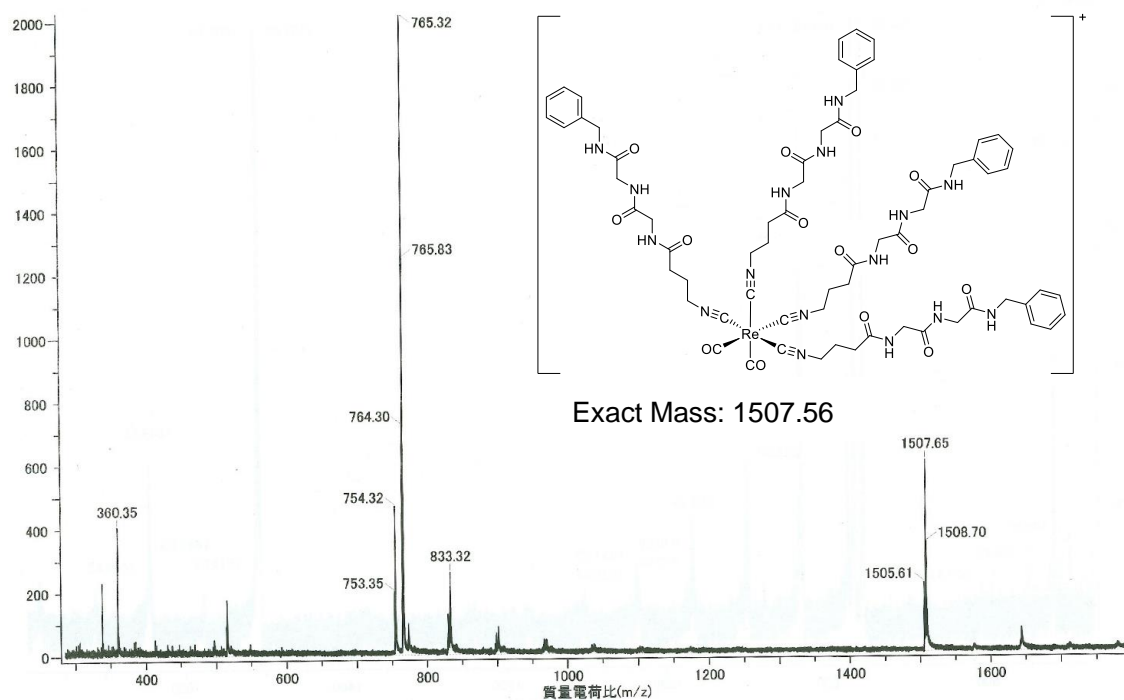

**Figure S11a.** ESI-MS spectrum of  $[\text{}^{185/187}\text{Re}(\text{CO})_2(\text{L}_G')_4]^+$  (**11**).

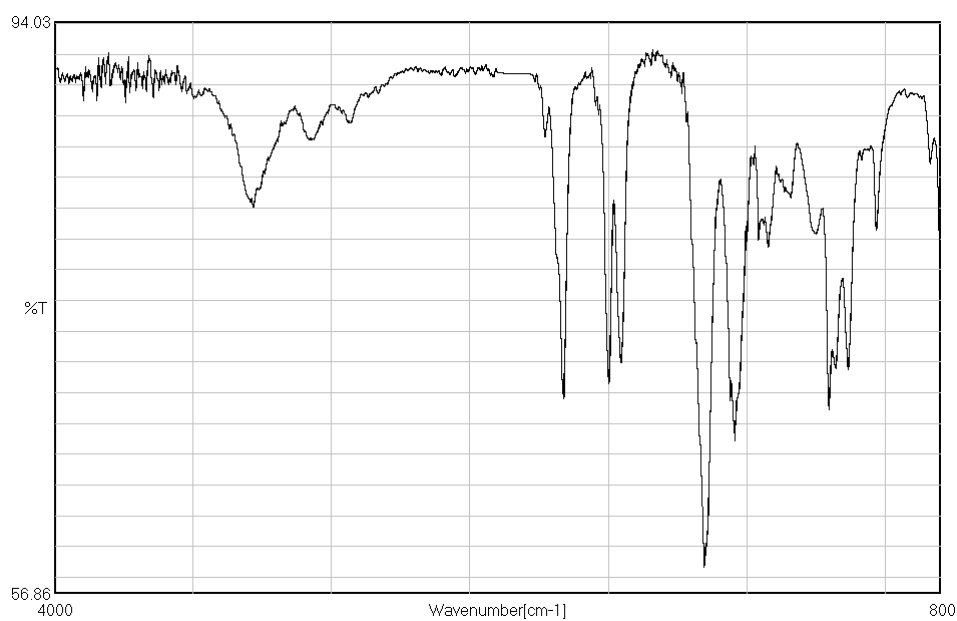

**Figure S11b.** IR spectrum (ATR) of  $[\text{}^{185/187}\text{Re}(\text{CO})_2(\text{L}_G')_4]^+$  (**11**).

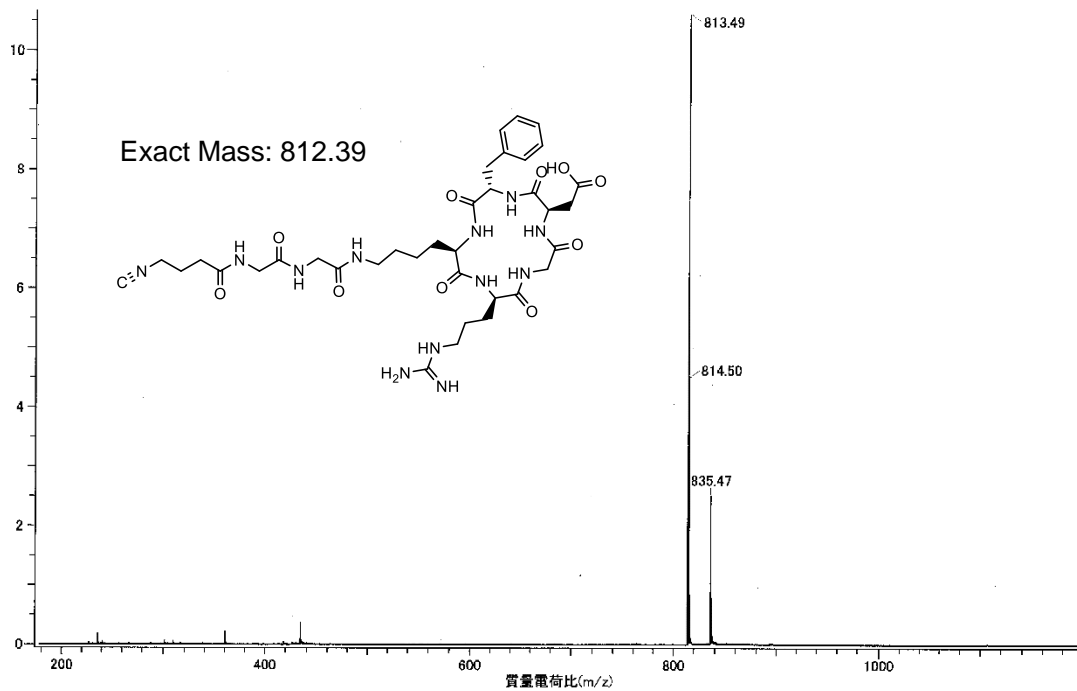

Figure S12a. ESI-MS spectrum of L<sub>G</sub> (16).

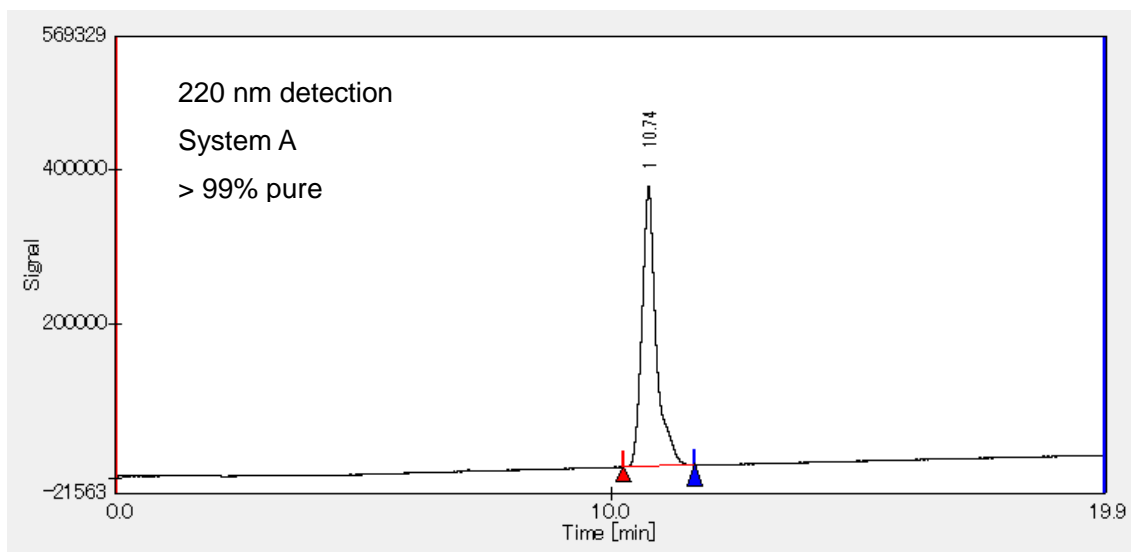

Figure S12b. HPLC chromatogram of L<sub>G</sub> monitored at 220 nm using system 10, which showed >95% purity.

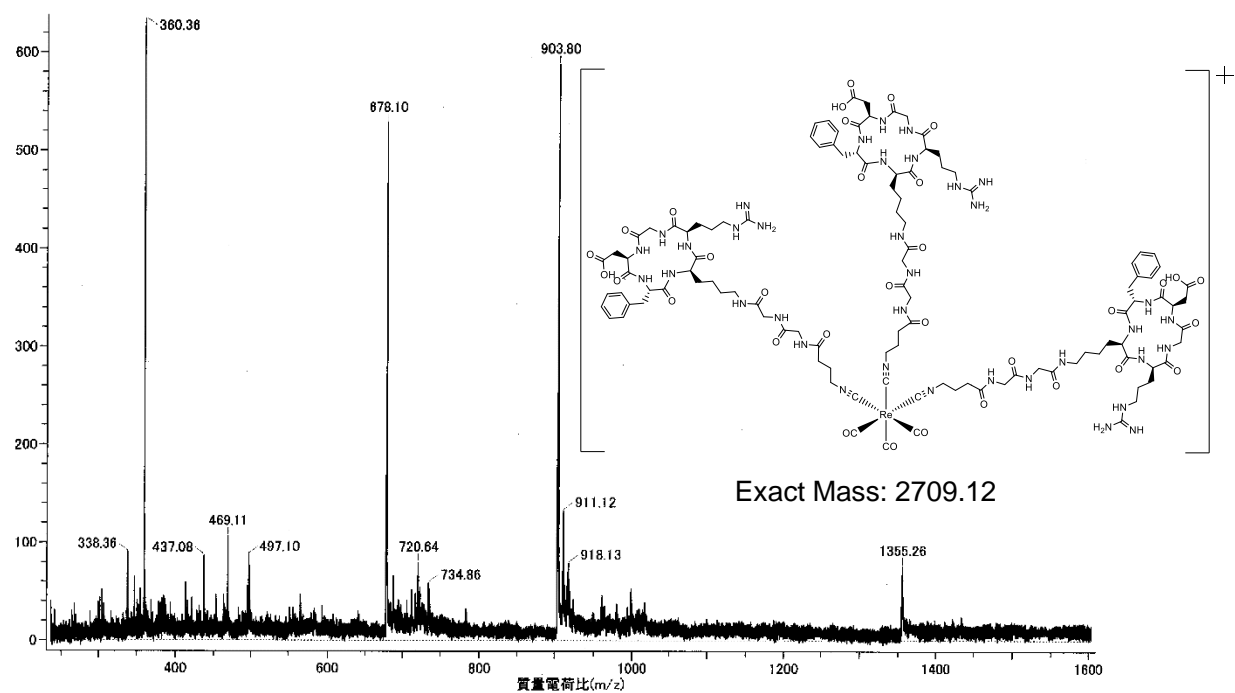

**Figure S13a.** ESI-MS spectrum of  $[^{185/187}\text{Re}(\text{CO})_3(\text{LG})_3]^+$  (**17**).

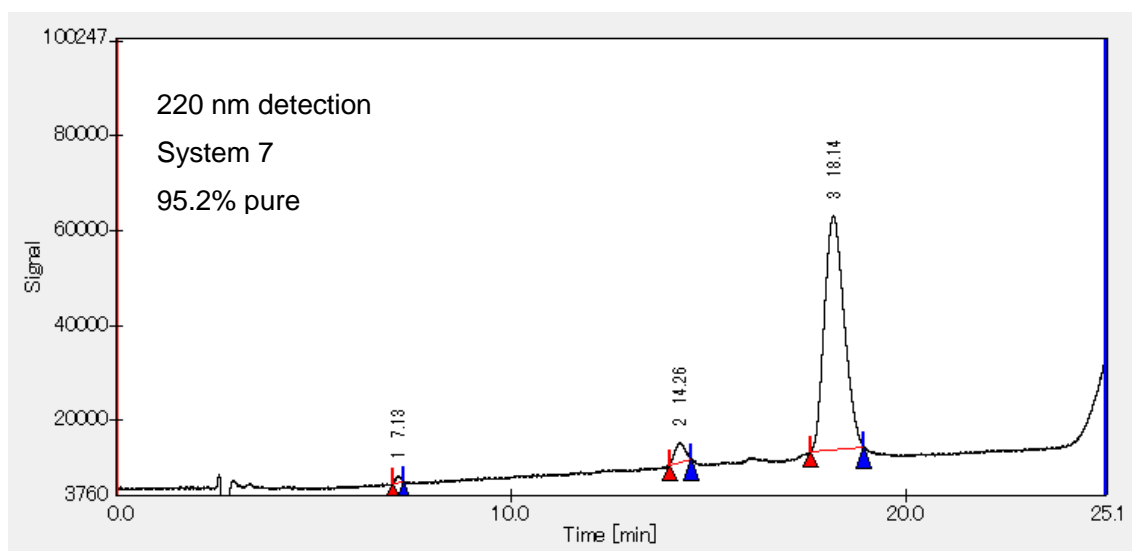

**Figure S13b.** HPLC chromatogram of  $[^{185/187}\text{Re}(\text{CO})_3(\text{LG})_3]^+$  monitored at 220 nm using system 7, which showed >95% purity.

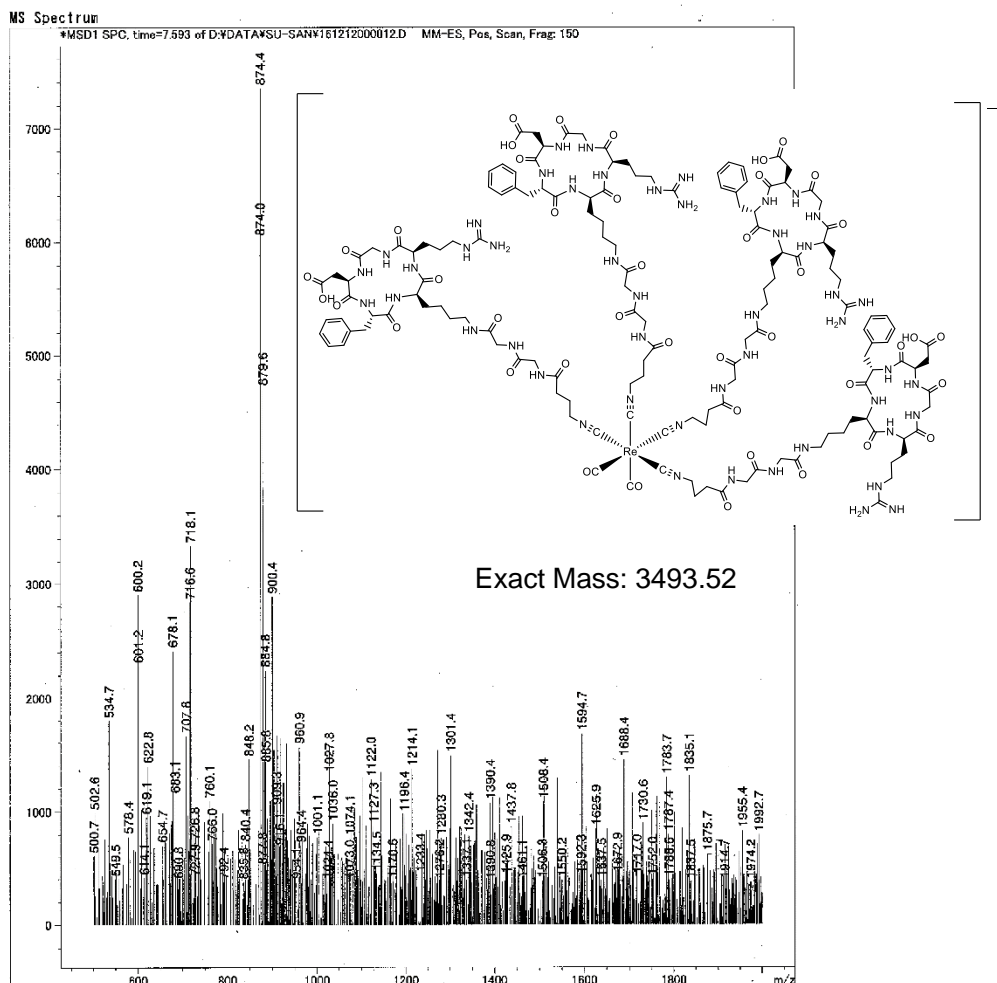

Figure S14a. ESI-MS spectrum of  $[^{185/187}\text{Re}(\text{CO})_2(\text{LG})_4]^+$  (**18**).

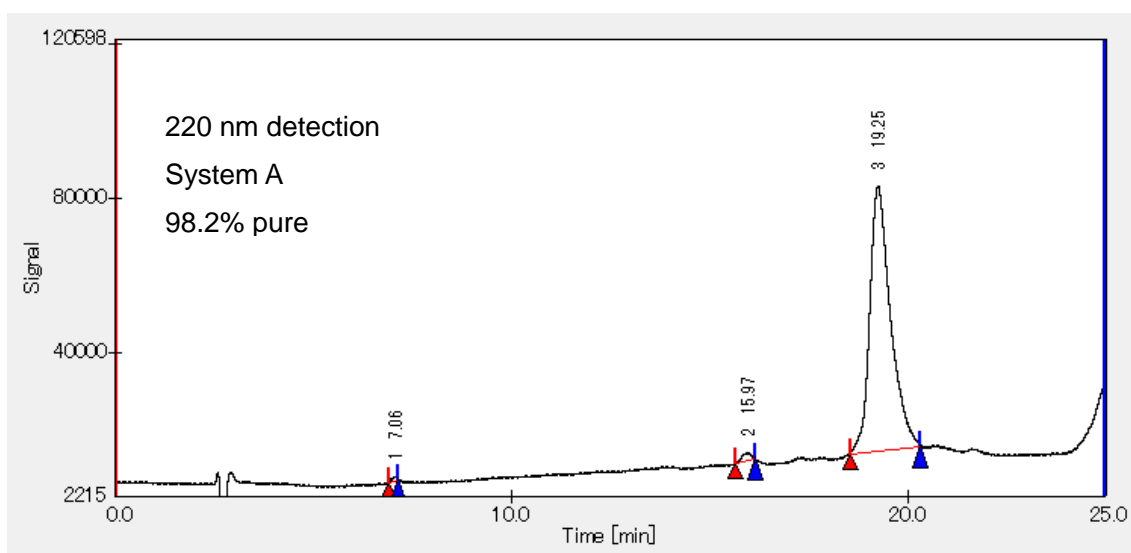

Figure S14b. HPLC chromatogram of  $[^{185/187}\text{Re}(\text{CO})_2(\text{LG})_4]^+$  monitored at 220 nm using system 7, which showed >95% purity.
